# Supplementary material for: Interrogation of the Protein-Protein Interactions between Human BRCA2 BRC Repeats and RAD51 Reveals Atomistic Determinants of Affinity
Source: PubMed Central journal article supplement (PMC3136434; doi:10.1371/journal.pcbi.1002096), 2011-07-14
Supplement: pcbi.1002096.s008.pdf [file pcbi.1002096.s008.pdf]

```

BRC1      -----NHSFGG-SFRTASNKEIKLSEHNIKKSKMFFKDIEEQY 37
BRC2      ---NEVGFRFG--FYSAHGTKLNVSTEALKAVK-LFSDIEN-- 35
BRC3      EQNIKDFETSDTFFQTASGKNISVAKESFNKIVNFFDKQPEEL 43
BRC4      ----KEPTLLG--FHTASGKKVKIAKESLDKVKNLFDKEQ-- 35
BRC5      ----IENSALA--FYTSCSRKTSVSQTSLEAKKWLREGIF-- 35
BRC6      -----VGPPAFRIASGKIVCVSHETIKKVKDIFTDS---- 31
BRC7      -----TCG-IFSTASGKSVQVSDASLQARQVFSEIED-- 32
BRC8      -----AFSG--FSTASGKQVSILESSLHKVKGVLLEFDLI- 33
BRC4T08A  ----KEPTLLG--FHAASGKKVKIAKESLDKVKNLFDKEQ-- 35
          *   :   .       :       :       :       :

```

*Figure S8. Sequence alignment of the eight human BRC repeats and a BRC4T08A mutation used in our FP assays, generated with ClustalW. The symbols on the bottom row denote the degree of conservation observed in each column: '\*' denotes that the residues in that column are identical in all sequences in the alignment, ':' denotes that conserved substitutions have been observed and '.' denotes that semi-conserved substitutions are observed.*
