# Supplementary material for: Interrogation of the Protein-Protein Interactions between Human BRCA2 BRC Repeats and RAD51 Reveals Atomistic Determinants of Affinity
Source: PubMed Central journal article supplement (PMC3136434; doi:10.1371/journal.pcbi.1002096), 2011-07-14
Supplement: pcbi.1002096.s011.pdf [file pcbi.1002096.s011.pdf]

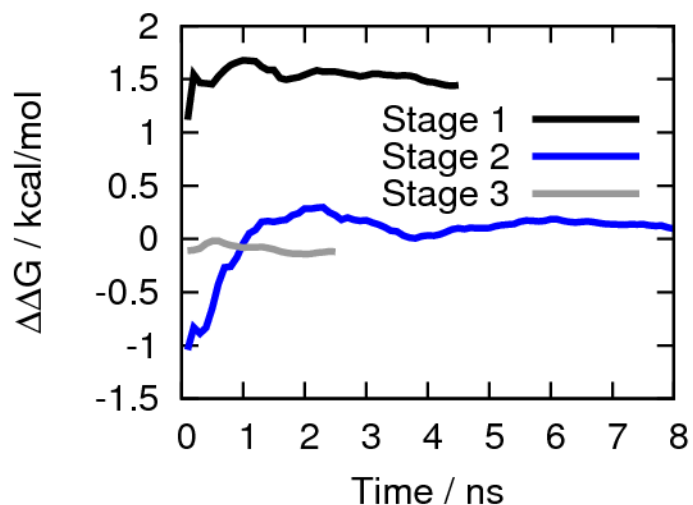

| $\Delta G$ / kcal/mol | Stage 1 | Stage 2 | Stage 3 |
|-----------------------|---------|---------|---------|
| Protein               | 31.6    | 1.0     | 2.7     |
| Water                 | 30.2    | 0.9     | 2.8     |

Figure S11. Convergence of the free energy of the T08A mutation in the RAD51-BRC4A complex using thermodynamic integration in three stages. Stage 1: Removal of partial charges from T08, stage 2: transformation of vdW parameters of T08 to A08 using soft-core potentials, stage 3: introduction of partial charges to A08.  $\Delta\Delta G = \Delta G(\text{protein}) - \Delta G(\text{water})$ . T08 does not form any direct hydrogen bonds with RAD51, yet the majority of the free energy change is due to the removal of charge in stage 1.
