# Supplementary material for: Interrogation of the Protein-Protein Interactions between Human BRCA2 BRC Repeats and RAD51 Reveals Atomistic Determinants of Affinity
Source: PLOS journal article supplement (doi:10.1371/journal.pcbi.1002096), 2011-07-14
Supplement: S12 (10.1371/journal.pcbi.1002096.s012) [file journal.pcbi.1002096.s012]

301 Moved Permanently

# Moved Permanently

The document has moved here.

---

Apache Server at www.ploscompbiol.org Port 80
